# Supplementary material for: Amino acids integrate behaviors in nerveless placozoans
Source: PubMed Central journal article supplement (PMC10133484; doi:10.3389/fnins.2023.1125624), 2023-04-13
Supplement: Data_Sheet_3.pdf [file Data_Sheet_3.pdf]

**Supplemental Figures:**

**Glutamate, aspartate, GABA, glycine, and ATP integrate locomotion and feeding behaviors in placozoans**

**Mikhail A. Nikitin, Darja Y. Romanova, Simkha I. Borman, Leonid L. Moroz**

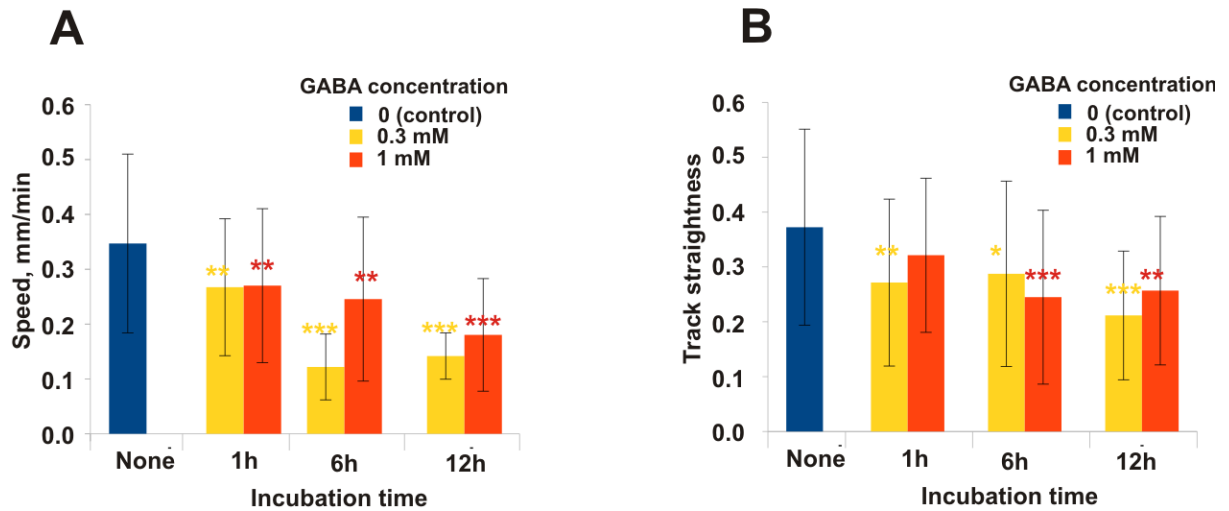

**Supplemental Figure 1.** Effects of GABA on the locomotion of *Trichoplax* on a conditioned dish. **(A)** Animal locomotion on a clean dish is increased over time in control but slightly decreases during incubation with 0.3 or 1 mM GABA. Asterisks denote a significant difference in speed from the control (Welch t-test, \*\*\* -  $p < 0.001$ ). N animals = 98, 50, 74, 29, 46, 69, 35, 44, and 72, respectively. **(B)**. Track straightness on a clean dish does not change over time in control but decreases during incubation with GABA (tracks become more convoluted). N animals are the same as in A.

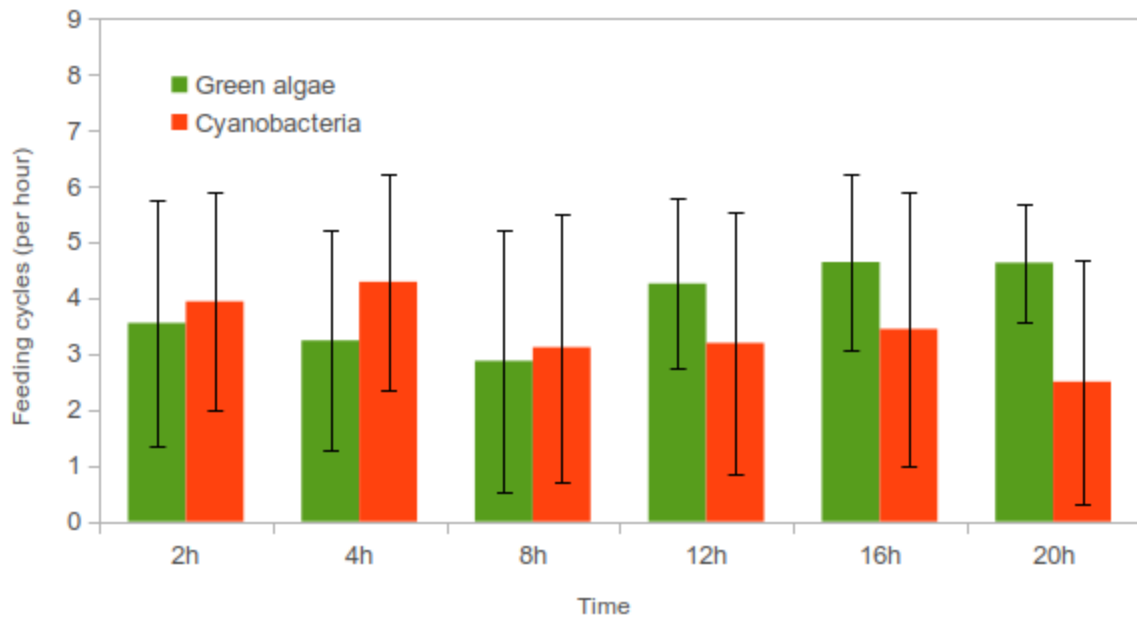

**Supplemental figure S2. Comparison of feeding dynamics on green algae *Tetraselmis* and cyanobacteria *Oscillatoria*.** After 12 hours, feeding on cyanobacteria is less active than on green algae, and the standard deviation of feeding activity is higher on cyanobacteria. N animals = 40 for green algae and 48 for cyanobacteria.

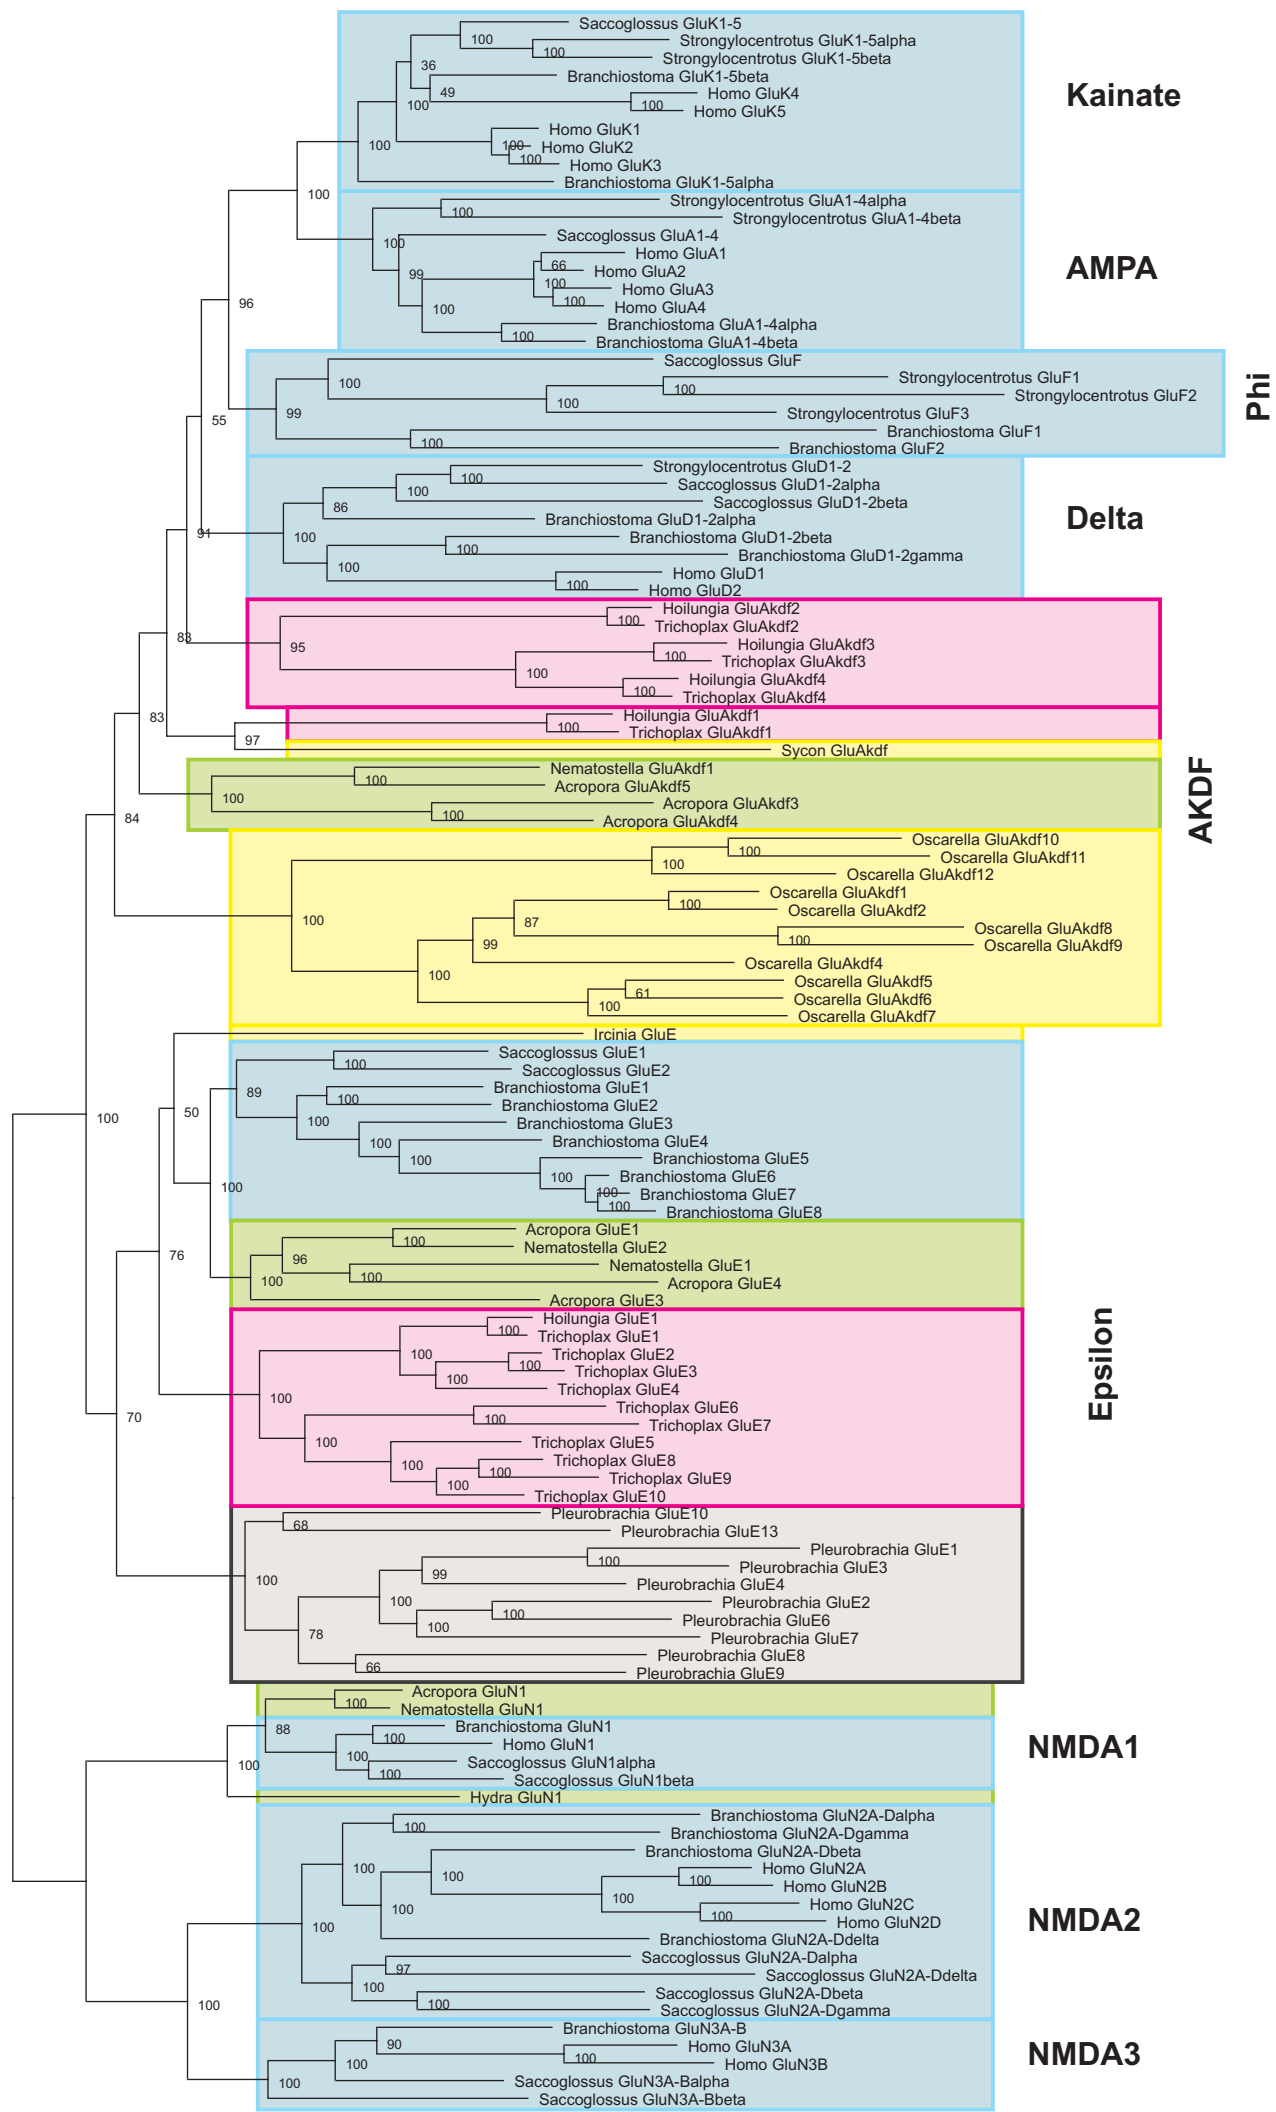

0.6

**Placozoa**
 **Porifera**
 **Cnidaria**
 **Bilateria**

**Supplemental figure S3. Bayesian phylogenetic tree of ionotropic glutamate receptors.** Numbers denote bayesian posterior probability near nodes. Analysis was run for 1.42 million generations, and convergence was checked with Tracer. Sequences were aligned using E-INS-i algorithm implemented in MAFFT online. Alignment consisted of 2472 positions, 1348 of them parsimony-informative.

# Bilateria mGluR (outgroup)

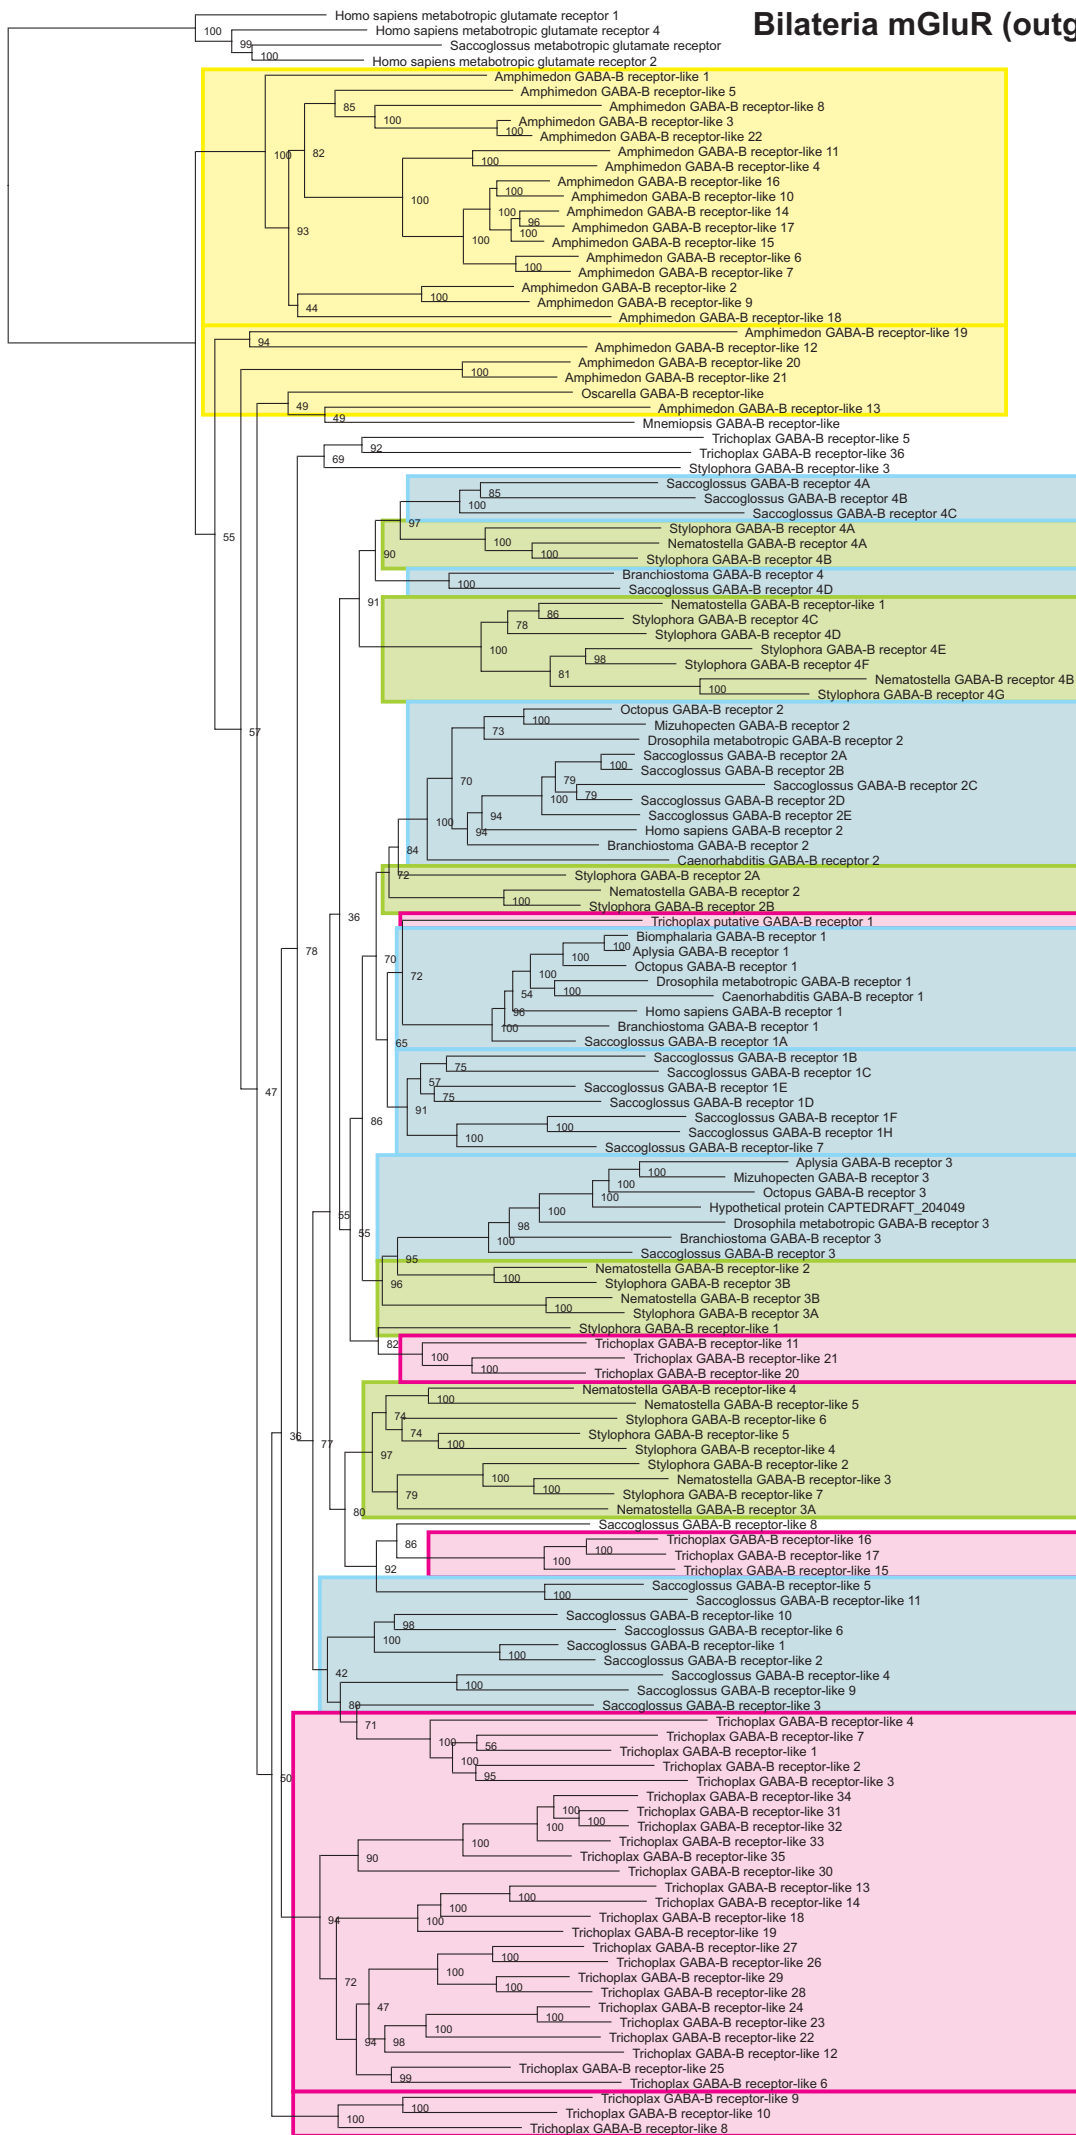

**Deuterostomia  
and Cnidaria  
GABA-B R4**

**Bilateria  
GABA-B R2**

**Bilateria  
GABA-B R1**

**Bilateria  
GABA-B R3**

0.7

Placozoa
  Porifera
  Cnidaria
  Bilateria

**Supplemental figure S4. Maximum Likelihood phylogenetic tree of metabotropic glutamate and related receptors.** Numbers denote ultrafast bootstrap support near nodes. Sequences were aligned using E-INS-i algorithm implemented in MAFFT online. Alignment consisted of 4071 positions, 1464 of them parsimony-informative.

# Gaba-B receptors (outgroup)

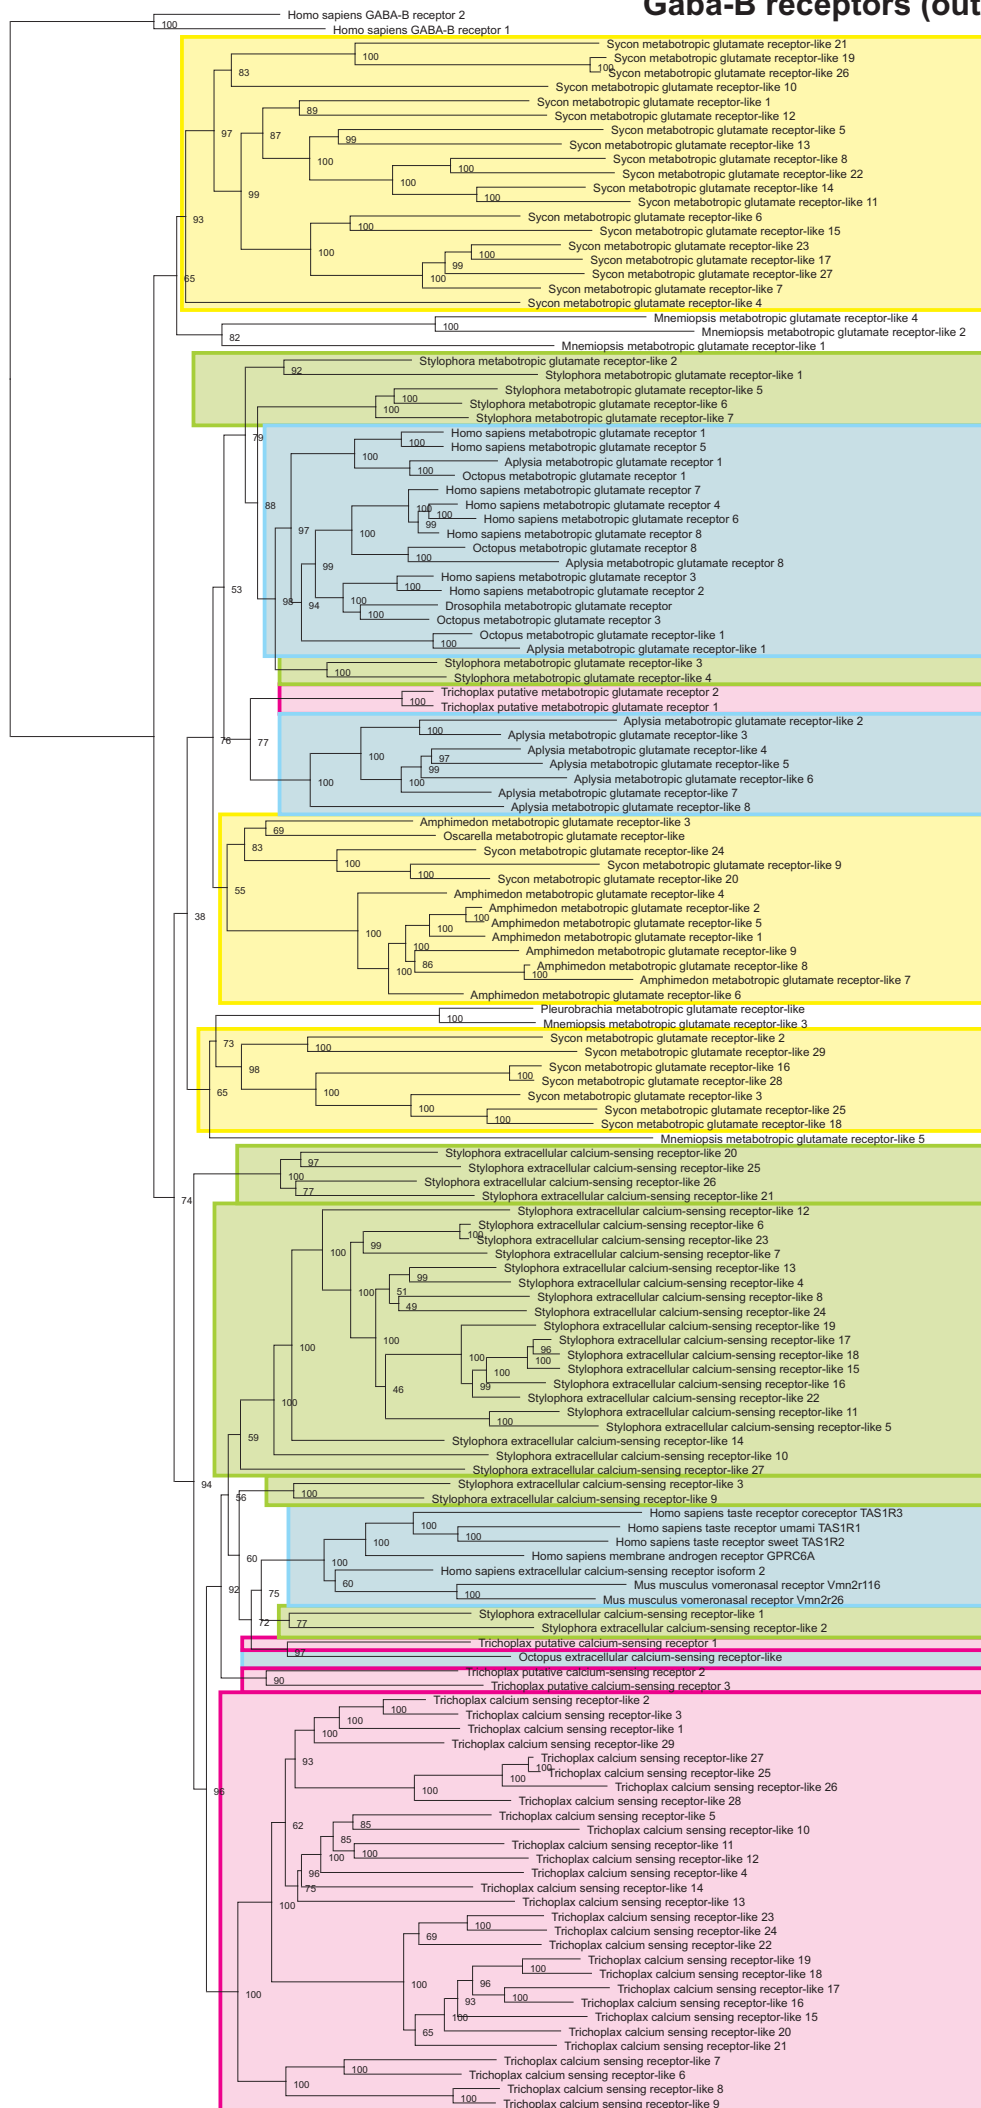

**Bilateria  
mGluR**

**Bilateria  
extracellular  
calcium-sensing,  
taste and  
vomeronasal**

0.6

Placozoa
  Porifera
  Cnidaria
  Bilateria



**Supplemental figure S5. Maximum Likelihood phylogenetic tree of metabotropic GABA receptors.** Numbers denote ultrafast bootstrap support near nodes. Sequences were aligned using E-INS-i algorithm implemented in MAFFT online. Alignment consisted of 5312 positions, 1376 of them parsimony-informative.

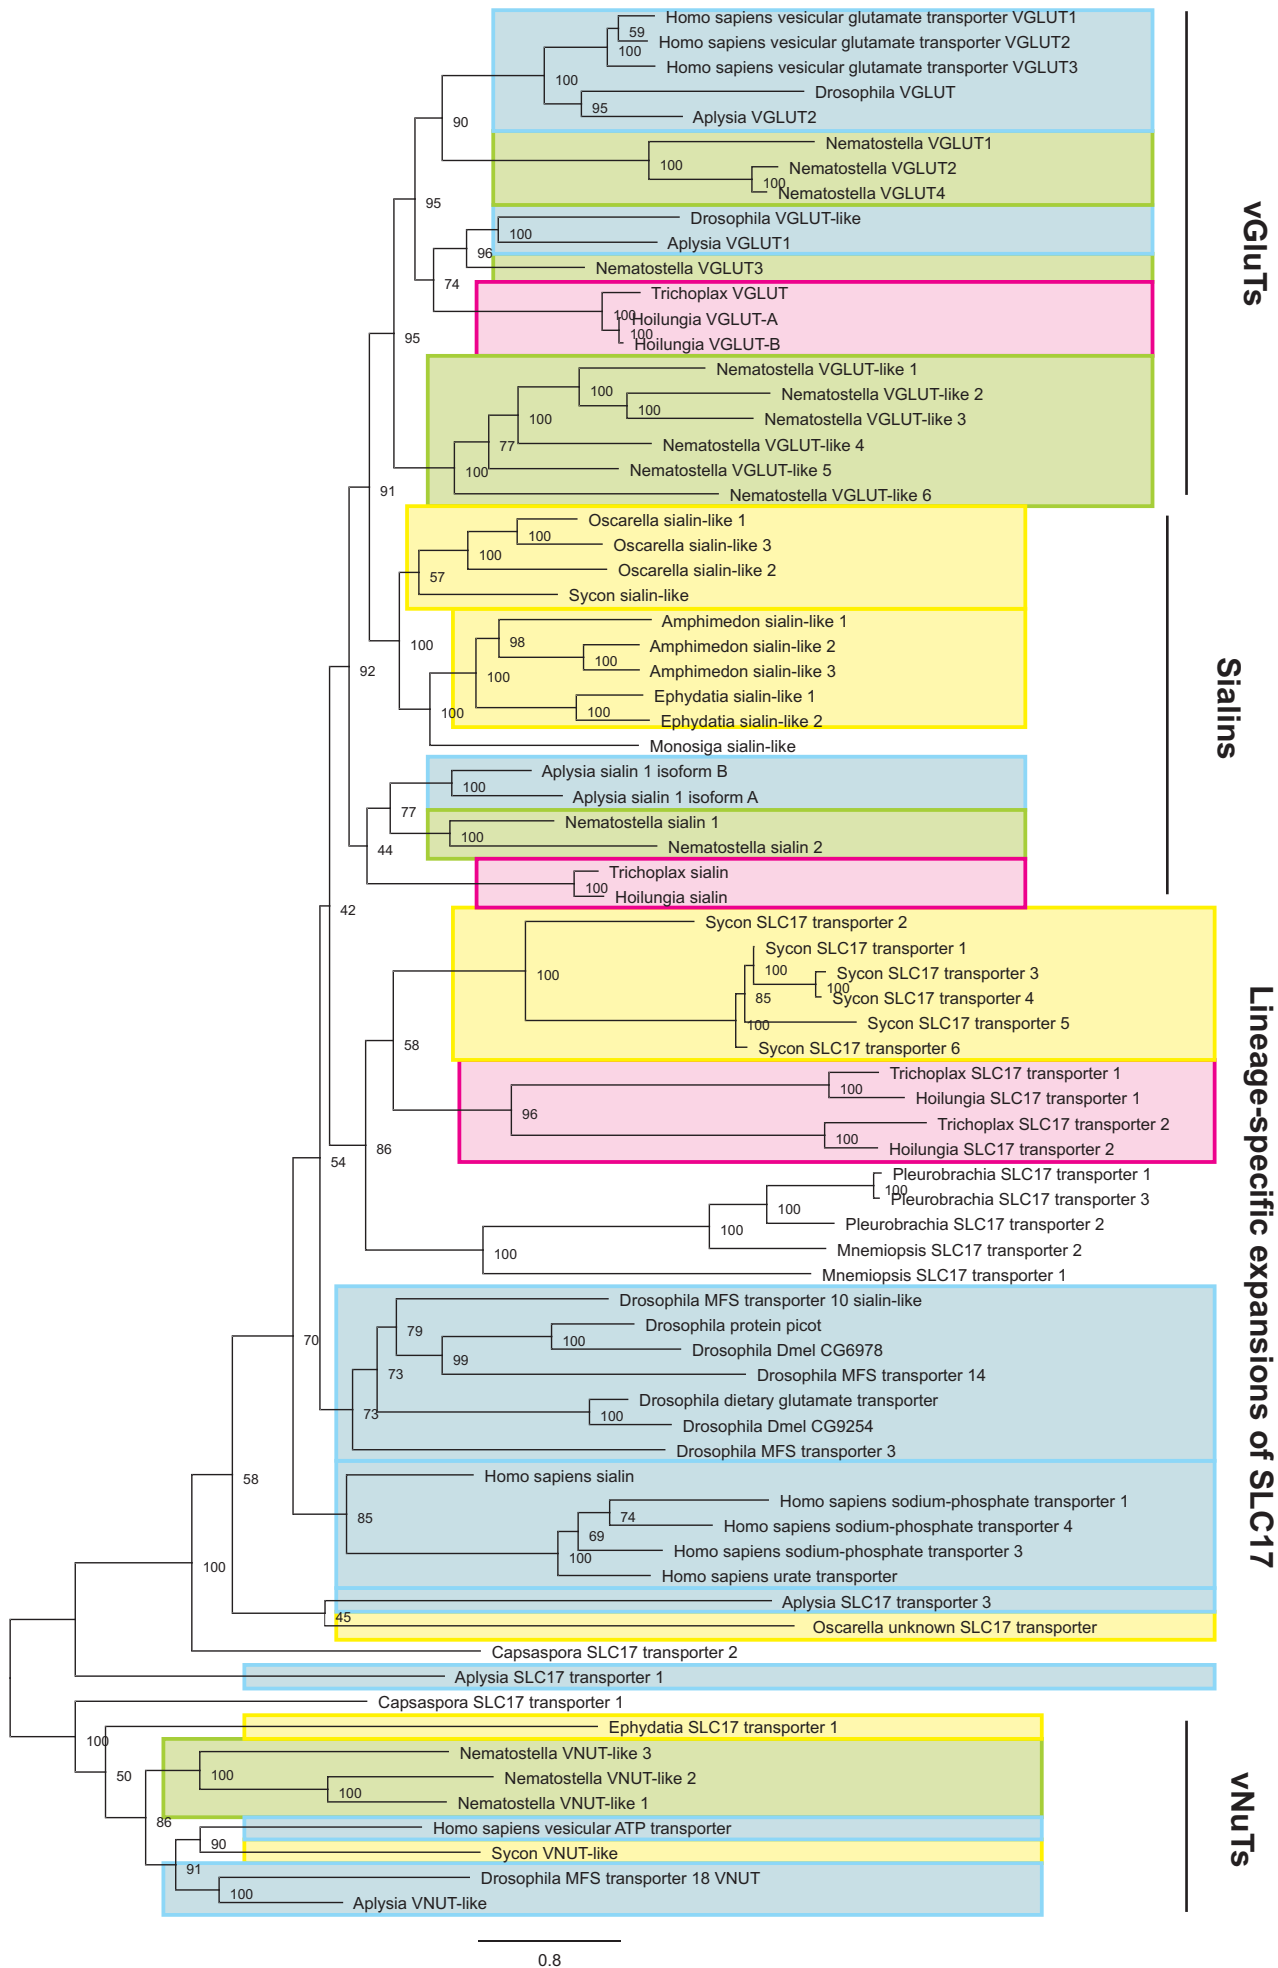

**Placozoa**
 **Porifera**
 **Cnidaria**
 **Bilateria**

**Supplemental figure S6. Bayesian phylogenetic tree of vesicular glutamate and related transporters (SLC17 family).** Numbers denote bayesian posterior probability near nodes. Analysis was run for 10 million generations, and convergence was checked with Tracer. Sequences were aligned using E-INS-i algorithm implemented in MAFFT online. Alignment consisted of 1036 positions, 603 of them parsimony-informative.
